# Supplementary material for: Social, biological, and programmatic factors linking adolescent pregnancy and early childhood undernutrition: a path analysis of India's 2016 National Family and Health Survey
Source: PubMed Central journal article supplement (PMC6558962; doi:10.1016/s2352-4642(19)30110-5), 2019-07
Supplement: mmc1.pdf [file mmc1.pdf]

# THE LANCET

## Child & Adolescent Health

### Supplementary appendix

This appendix formed part of the original submission and has been peer reviewed. We post it as supplied by the authors.

Supplement to: Nguyen PH, Scott S, Neupane S, Tran LM, Menon P. Social, biological, and programmatic factors linking adolescent pregnancy and early childhood undernutrition: a path analysis of India's 2016 National Family and Health Survey. *Lancet Child Adolesc Health* 2019; published online May 15. [http://dx.doi.org/10.1016/S2352-4642\(19\)30110-5](http://dx.doi.org/10.1016/S2352-4642(19)30110-5).

**Supplemental Table 1. Systematic literature review of evidence for linkage between adolescent pregnancy and child undernutrition\***

| Author, year                                   | Country                                                          | Outcomes examined    |                              |                    |                        |                             |                                     |                                |                   |
|------------------------------------------------|------------------------------------------------------------------|----------------------|------------------------------|--------------------|------------------------|-----------------------------|-------------------------------------|--------------------------------|-------------------|
|                                                |                                                                  | Child undernutrition | Education & bargaining power | Maternal nutrition | Access to ANC services | Access to delivery services | Access to services during childhood | Infant and young child feeding | Living Conditions |
| Kane <i>et al.</i> , 2018 <sup>1</sup>         | US                                                               | x                    |                              |                    |                        |                             |                                     |                                |                   |
| Sarker <i>et al.</i> , 2018 <sup>2</sup>       | Bangladesh                                                       |                      | x                            |                    |                        |                             |                                     |                                | x                 |
| Marphatia <i>et al.</i> , 2017 <sup>3</sup>    | Bangladesh, India, Nepal, and Pakistan                           | x                    | x                            | x                  | x                      | x                           |                                     |                                | x                 |
| Chari <i>et al.</i> , 2017 <sup>4</sup>        | India                                                            | x                    | x                            |                    |                        |                             | x                                   |                                |                   |
| Yussif <i>et al.</i> , 2017 <sup>5</sup>       | Ghana                                                            | x                    |                              |                    |                        |                             |                                     |                                |                   |
| Nguyen <i>et al.</i> , 2017 <sup>6</sup>       | Bangladesh                                                       | x                    | x                            | x                  |                        |                             |                                     |                                |                   |
| Islam <i>et al.</i> , 2017 <sup>7</sup>        | Bangladesh                                                       |                      | x                            |                    |                        |                             |                                     |                                | x                 |
| Delprato <i>et al.</i> , 2017 <sup>8</sup>     | Sub-Saharan Africa and Southwest Asia                            |                      | x                            |                    | x                      | x                           | x                                   |                                |                   |
| Owolabi <i>et al.</i> , 2017 <sup>9</sup>      | 13 west African countries                                        |                      |                              |                    | x                      |                             |                                     |                                |                   |
| Acharya <i>et al.</i> , 2017 <sup>10</sup>     | Nepal                                                            |                      |                              |                    |                        | x                           |                                     |                                |                   |
| Mombo-Ngoma <i>et al.</i> , 2016 <sup>11</sup> | Benin, Gabon, Mozambique, Tanzania                               | x                    | x                            | x                  | x                      |                             |                                     |                                |                   |
| Vir, 2016 <sup>12</sup>                        | South Asia                                                       | x                    | x                            | x                  | x                      | x                           | x                                   | x                              | x                 |
| Traisrisilp <i>et al.</i> , 2015 <sup>13</sup> | Thailand                                                         | x                    |                              |                    |                        |                             |                                     |                                |                   |
| Fall <i>et al.</i> , 2015 <sup>14</sup>        | Brazil, Guatemala, India, Philippines, and South Africa          | x                    |                              |                    |                        |                             |                                     |                                |                   |
| Goli <i>et al.</i> , 2015 <sup>15</sup>        | India                                                            |                      |                              | x                  |                        |                             |                                     |                                |                   |
| Ganchimeg <i>et al.</i> , 2014 <sup>16</sup>   | 29 countries in Africa, Latin America, Asia and the Middle East. | x                    |                              |                    |                        |                             |                                     |                                |                   |
| Fink <i>et al.</i> , 2014 <sup>17</sup>        | 61 LMICs                                                         | x                    |                              | x                  |                        |                             |                                     |                                | x                 |
| Godha <i>et al.</i> , 2013 <sup>18</sup>       | India, Bangladesh, Nepal, and Pakistan                           |                      |                              |                    | x                      | x                           |                                     |                                |                   |
| Prakash <i>et al.</i> , 2011 <sup>19</sup>     | India                                                            | x                    | x                            | x                  |                        |                             |                                     |                                | x                 |
| Bakker <i>et al.</i> , 2011 <sup>20</sup>      | The Netherlands                                                  | x                    | x                            | x                  |                        |                             |                                     |                                |                   |
| Rah <i>et al.</i> , 2008 <sup>21</sup>         | Bangladesh                                                       |                      |                              | x                  |                        |                             |                                     |                                |                   |
| Abdullah <i>et al.</i> , 2007 <sup>22</sup>    | Bangladesh                                                       | x                    | x                            | x                  |                        |                             | x                                   |                                | x                 |

|                                               |    |   |   |   |
|-----------------------------------------------|----|---|---|---|
| Chandra <i>et al.</i> , 2002 <sup>23</sup>    | US | x | x |   |
| Motil <i>et al.</i> , 1997 <sup>24</sup>      | US |   |   | x |
| Verrier <i>et al.</i> , 1993 <sup>25</sup>    | US | x |   |   |
| Fraser <i>et al.</i> , 1995 <sup>26</sup>     | US | x |   |   |
| Keterlinus <i>et al.</i> , 1990 <sup>27</sup> | US | x |   |   |

\*The search was conducted in PubMed between December 15 and 19, 2018. Search terms included (adolescent OR adolescence OR teenage OR teen) AND (pregnant OR pregnancy) AND (infant OR child) AND (stunting OR stunted); English language and Human study filters were applied; the search yielded 1170 items, which were screened for relevance. Among the relevant items, references were also examined for additional relevant studies.

1. Kane JB, Harris KM, Siega-Riz AM. Intergenerational pathways linking maternal early life adversity to offspring birthweight. *Soc Sci Med* 2018; **207**: 89-96.
2. Sarker AR, Sheikh N, Mahumud RA, Sultana M. Determinants of adolescent maternal healthcare utilization in Bangladesh. *Public Health* 2018; **157**: 94-103.
3. Marphatia AA, Ambale GS, Reid AM. Women's Marriage Age Matters for Public Health: A Review of the Broader Health and Social Implications in South Asia. *Front Public Health* 2017; **5**: 269.
4. Chari AV, Heath R, Maertens A, Fatima F. The causal effect of maternal age at marriage on child wellbeing: Evidence from India. *Journal of Development Economics* 2017; **127**: 42-55.
5. Yussif AS, Lassef A, Ganyaglo GY, Kantelhardt EJ, Kielstein H. The long-term effects of adolescent pregnancies in a community in Northern Ghana on subsequent pregnancies and births of the young mothers. *Reprod Health* 2017; **14**(1): 178.
6. Nguyen PH, Sanghvi T, Tran LM, et al. The nutrition and health risks faced by pregnant adolescents: Insights from a cross-sectional study in Bangladesh. *PLoS One* 2017; **12**(6): e0178878.
7. Islam MM, Islam MK, Hasan MS, Hossain MB. Adolescent motherhood in Bangladesh: Trends and determinants. *PLoS One* 2017; **12**(11): e0188294.
8. Delprato M, Akyeampong K. The Effect of Early Marriage Timing on Women's and Children's Health in Sub-Saharan Africa and Southwest Asia. *Ann Glob Health* 2017; **83**(3-4): 557-67.
9. Owolabi OO, Wong KLM, Dennis ML, et al. Comparing the use and content of antenatal care in adolescent and older first-time mothers in 13 countries of west Africa: a cross-sectional analysis of Demographic and Health Surveys. *Lancet Child Adolesc Health* 2017; **1**(3): 203-12.
10. Acharya P, Adhikari TB, Neupane D, Thapa K, Bhandari PM. Correlates of institutional deliveries among teenage and non-teenage mothers in Nepal. *PLoS One* 2017; **12**(10): e0185667.
11. Mombo-Ngoma G, Mackanga JR, Gonzalez R, et al. Young adolescent girls are at high risk for adverse pregnancy outcomes in sub-Saharan Africa: an observational multicountry study. *BMJ Open* 2016; **6**(6): e011783.
12. Vir SC. Improving women's nutrition imperative for rapid reduction of childhood stunting in South Asia: coupling of nutrition specific interventions with nutrition sensitive measures essential. *Maternal & child nutrition* 2016; **12 Suppl 1**: 72-90.
13. Traisrisilp K, Jaiprom J, Luewan S, Tongsong T. Pregnancy outcomes among mothers aged 15 years or less. *J Obstet Gynaecol Res* 2015; **41**(11): 1726-31.
14. Fall CH, Sachdev HS, Osmond C, et al. Association between maternal age at childbirth and child and adult outcomes in the offspring: a prospective study in five low-income and middle-income countries (COHORTS collaboration). *Lancet Glob Health* 2015; **3**(7): e366-77.
15. Goli S, Rammohan A, Singh D. The Effect of Early Marriages and Early Childbearing on Women's Nutritional Status in India. *Matern Child Health J* 2015; **19**(8): 1864-80.
16. Ganchimeg T, Ota E, Morisaki N, et al. Pregnancy and childbirth outcomes among adolescent mothers: a World Health Organization multicountry study. *BJOG* 2014; **121 Suppl 1**: 40-8.
17. Fink G, Sudfeld CR, Danaei G, Ezzati M, Fawzi WW. Scaling-up access to family planning may improve linear growth and child development in low and middle income countries. *PLoS One* 2014; **9**(7): e102391.

18. Godha D, Hotchkiss DR, Gage AJ. Association between child marriage and reproductive health outcomes and service utilization: a multi-country study from South Asia. *J Adolesc Health* 2013; **52**(5): 552-8.
19. Prakash R, Singh A, Pathak PK, Parasuraman S. Early marriage, poor reproductive health status of mother and child well-being in India. *J Fam Plann Reprod Health Care* 2011; **37**(3): 136-45.
20. Bakker R, Steegers EA, Biharie AA, Mackenbach JP, Hofman A, Jaddoe VW. Explaining differences in birth outcomes in relation to maternal age: the Generation R Study. *BJOG* 2011; **118**(4): 500-9.
21. Rah JH, Christian P, Shamim AA, Arju UT, Labrique AB, Rashid M. Pregnancy and lactation hinder growth and nutritional status of adolescent girls in rural Bangladesh. *The Journal of nutrition* 2008; **138**(8): 1505-11.
22. Abdullah K, Malek MA, Faruque AS, Salam MA, Ahmed T. Health and nutritional status of children of adolescent mothers: experience from a diarrhoeal disease hospital in Bangladesh. *Acta Paediatr* 2007; **96**(3): 396-400.
23. Chandra PC, Schiavello HJ, Ravi B, Weinstein AG, Hook FB. Pregnancy outcomes in urban teenagers. *Int J Gynaecol Obstet* 2002; **79**(2): 117-22.
24. Motil KJ, Kertz B, Thotathuchery M. Lactational performance of adolescent mothers shows preliminary differences from that of adult women. *J Adolesc Health* 1997; **20**(6): 442-9.
25. Verrier M, Spears W, Ying J, Kerr GR. Patterns of birth weight in relation to gestational age, maternal age, parity, and prenatal care in Texas' triethnic population, 1984 through 1986. *Tex Med* 1993; **89**(12): 51-6.
26. Fraser AM, Brockert JE, Ward RH. Association of young maternal age with adverse reproductive outcomes. *N Engl J Med* 1995; **332**(17): 1113-7.
27. Ketterlinus RD, Henderson SH, Lamb ME. Maternal age, sociodemographics, prenatal health and behavior: influences on neonatal risk status. *J Adolesc Health Care* 1990; **11**(5): 423-31.

**Supplemental Table 2. Household, maternal and child characteristics of primiparous Indian women aged 15-49 years by age at first birth.**

|                            | First birth during adolescence (10-19 y) |                | First birth during young adulthood (20-24 y) |                | First birth during adulthood (25 -49 y) |               |
|----------------------------|------------------------------------------|----------------|----------------------------------------------|----------------|-----------------------------------------|---------------|
|                            | Total women                              | N (%) or mean  | Total women                                  | N (%) or mean  | Total women                             | N (%) or mean |
| <b>Household</b>           |                                          |                |                                              |                |                                         |               |
| Household size, n          | 14,107                                   | 6.02           | 31,475                                       | 5.91           | 14,514                                  | 5.50          |
| Place of residence (rural) | 14,107                                   | 11,243 (76.60) | 31,475                                       | 22,824 (67.02) | 14,514                                  | 8,584 (48.95) |
| Religion, %                |                                          |                |                                              |                |                                         |               |
| Hindu                      | 14,107                                   | 10,414 (77.67) | 31,475                                       | 24,174 (80.94) | 14,514                                  | 10,162(80.41) |
| Muslim                     | 14,107                                   | 2,284 (18.41)  | 31,475                                       | 4,003 (13.54)  | 14,514                                  | 1,724 (10.28) |
| Other                      | 14,107                                   | 1,409 (3.92)   | 31,475                                       | 3,298 (5.52)   | 14,514                                  | 2,628 (9.31)  |
| <b>Mother</b>              |                                          |                |                                              |                |                                         |               |
| Age, y                     | 14,107                                   | 20.07          | 31,475                                       | 23.60          | 14,514                                  | 29.59         |
| Age at marriage, y         | 13,718                                   | 16.41          | 30,855                                       | 19.68          | 14,128                                  | 24.31         |
| Age at first birth, y      | 14,107                                   | 18.08          | 31,475                                       | 21.76          | 14,514                                  | 27.60         |
| Caste category, %          |                                          |                |                                              |                |                                         |               |
| Scheduled caste            | 14,107                                   | 2,722 (22.23)  | 31,475                                       | 5,605 (20.30)  | 14,514                                  | 2,072 (17.80) |
| Scheduled tribe            | 14,107                                   | 2,946 (12.14)  | 31,475                                       | 5,263 (9.21)   | 14,514                                  | 2,723 (7.13)  |
| Other backward class       | 14,107                                   | 5,309 (38.70)  | 31,475                                       | 12,828 (43.87) | 14,514                                  | 4,751 (40.11) |
| Occupation, %              |                                          |                |                                              |                |                                         |               |
| Not in work force          | 2,348                                    | 1,937 (84.64)  | 5,409                                        | 4,557 (86.22)  | 2,745                                   | 2,147 (78.63) |
| Agriculture or housewife   | 2,348                                    | 299 (10.27)    | 5,409                                        | 530 (8.10)     | 2,745                                   | 258 (8.74)    |
| Other                      | 2,348                                    | 112 (5.08)     | 5,409                                        | 322 (5.68)     | 2,745                                   | 340 (12.63)   |
| <b>Child</b>               |                                          |                |                                              |                |                                         |               |
| Age, mo                    | 13,903                                   | 22.87          | 31,167                                       | 22.40          | 14,327                                  | 24.32         |
| Male child, %              | 14,107                                   | 7,459 (52.65)  | 31,475                                       | 16,863 (53.87) | 14,514                                  | 7,623 (52.86) |

Data are from India's fourth National Family Health Survey (NFHS4, 2016)

**Supplemental Figure 1. Study sample diagram**

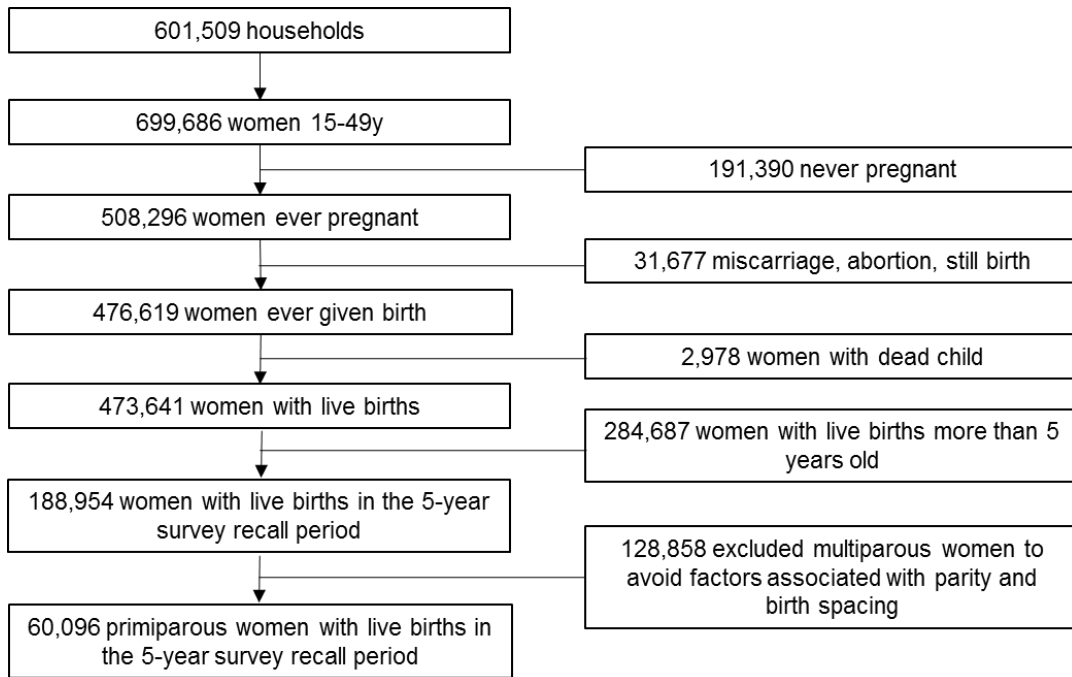

**Supplemental Figure 2. Attained WAZ and underweight for first-born children by child age and mother's age at first birth in India, 2016.**

**A. Weight-for-age z-score**

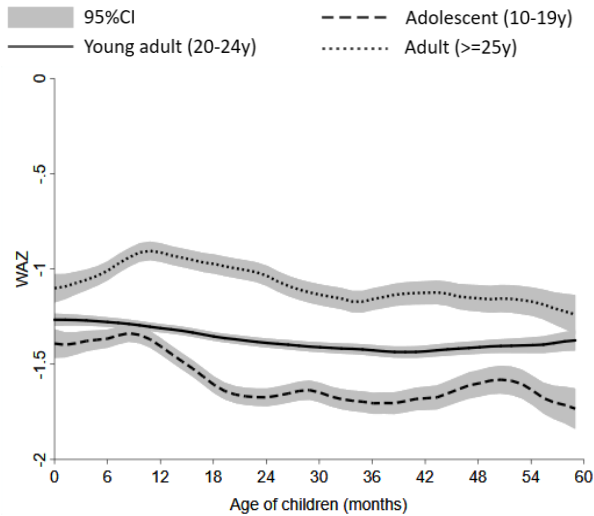

**B. Underweight**

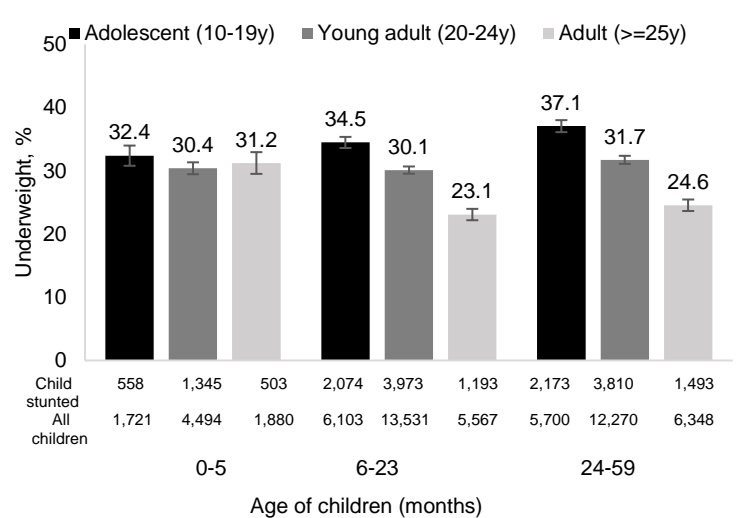

|                                 | OLS regression: WAZ |         | OLS regression: Underweight |         |
|---------------------------------|---------------------|---------|-----------------------------|---------|
|                                 | $\beta$ [95% CI]    | $p$     | $\beta$ [95% CI]            | $p$     |
| Adolescence vs. young adulthood | -0.16 [-0.22,-0.09] | <0.0001 | 0.04 [0.02,0.06]            | 0.002   |
| Adolescence vs. adulthood       | -0.40 [-0.47,-0.32] | <0.0001 | 0.10 [0.07,0.12]            | <0.0001 |

Curves are smooth local polynomials with 95% confidence intervals shown in gray. Adjusted coefficient [95% CI] for models with and without state fixed effects are shown below the figure. WHZ: weight-for-height z-score. Data are from India's fourth National Family Health Survey (NFHS4, 2016).

**Supplemental Figure 3. Attained WHZ and wasting for first-born children by child age and mother's age at first birth in India, 2016.**

**A. Weight-for-height z-score**

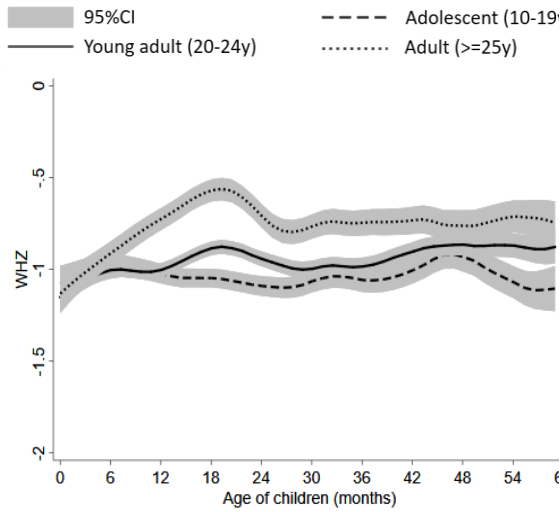

**B. Wasting**

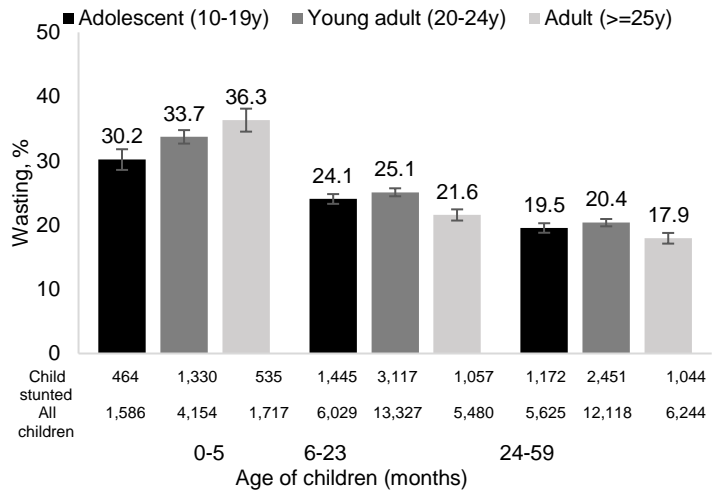

|                                 | OLS regression: WHZ |          | OLS regression: Wasting |          |
|---------------------------------|---------------------|----------|-------------------------|----------|
|                                 | $\beta$ [95% CI]    | <i>p</i> | $\beta$ [95% CI]        | <i>p</i> |
| Adolescence vs. young adulthood | -0.03 [-0.09,0.03]  | 0.298    | -0.01 [-0.03,0.00]      | 0.033    |
| Adolescence vs. adulthood       | -0.16 [-0.23,-0.08] | <0.0001  | 0.01 [-0.01,0.02]       | 0.681    |

Curves are smooth local polynomials with 95% confidence intervals shown in gray. Adjusted coefficient [95% CI] for models with and without state fixed effects are shown below the figure. WHZ: weight-for-height z-score. Data are from India's fourth National Family Health Survey (NFHS4, 2016).



**Supplemental Table 3. Comparing household, maternal and child characteristics of primiparous Indian women aged 15-49 years by sample with and without bargaining variables.**

|                            | Sample without bargaining variables<br>(n=49,535) |                | Sample with bargaining variables<br>(n=10,561) |               | p       |
|----------------------------|---------------------------------------------------|----------------|------------------------------------------------|---------------|---------|
|                            | Total women                                       | N (%) or mean  | Total women                                    | N (%) or mean |         |
| <b>Household</b>           |                                                   |                |                                                |               |         |
| Household size, n          | 49,535                                            | 5.89           | 10,561                                         | 5.64          | <0.0001 |
| Place of residence (rural) | 49,535                                            | 35,329 (65.72) | 10,561                                         | 7,322 (63.48) | 0.053   |
| Religion, %                |                                                   |                |                                                |               |         |
| Hindu                      | 49,535                                            | 36,932 (80.00) | 10,561                                         | 7,818 (80.00) | 1.000   |
| Muslim                     | 49,535                                            | 6,493 (13.95)  | 10,561                                         | 1,518 (14.38) | 0.541   |
| Other                      | 49,535                                            | 6,110 (6.06)   | 10,561                                         | 1,225 (5.62)  | 0.325   |
| <b>Mother</b>              |                                                   |                |                                                |               |         |
| Age, y                     | 49,535                                            | 24.05          | 10,561                                         | 24.18         | 0.079   |
| Age at marriage, y         | 48,361                                            | 19.88          | 10,340                                         | 20.06         | 0.005   |
| Age at first birth, y      | 49,535                                            | 22.14          | 10,561                                         | 22.26         | 0.071   |
| Caste category, %          |                                                   |                |                                                |               |         |
| Scheduled caste            | 49,535                                            | 8,606 (20.55)  | 10,561                                         | 1,793 (18.65) | 0.006   |
| Scheduled tribe            | 49,535                                            | 9,001 (9.44)   | 10,561                                         | 1,931 (9.60)  | 0.737   |
| Other backward class       | 49,535                                            | 18,956 (41.58) | 10,561                                         | 3,932 (42.37) | 0.387   |
| <b>Child</b>               |                                                   |                |                                                |               |         |
| Age, mo                    | 48,958                                            | 22.94          | 10,439                                         | 23.00         | 0.833   |
| Male child, %              | 49,535                                            | 26,358 (53.60) | 10,561                                         | 5,587 (53.34) | 0.061   |

Data are from India's fourth National Family Health Survey (NFHS4, 2016).
